# Supplementary material
Source: Springer Nature journal article supplement (https://www.springermedizin.de/resource/supplementary/12883_2010_376_MOESM1_ESM.pdf/9455262)

COMPLEX V (ATP SYNTHASE) ACTIVITY  
nmol x min<sup>-1</sup> x mg protein<sup>-1</sup>

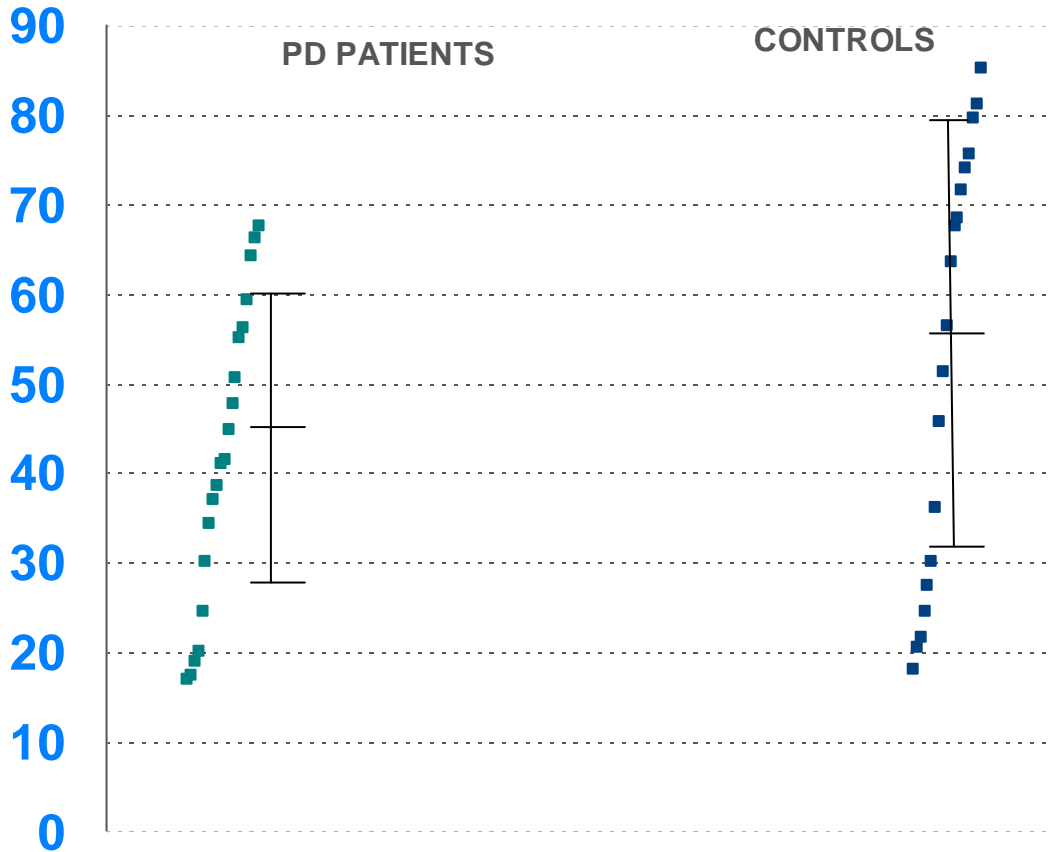

Supplement: MOESM1 [file 9455262]
